# Supplementary material for: Polyoxometalate supported on a magnetic Fe3O4/MIL-88A rod-like nanocomposite as an adsorbent for the removal of ciprofloxacin, tetracycline and cationic organic dyes from aqueous solutions
Source: Royal Society of Chemistry journal article supplement (doi:10.1039/d2ra07898h), 2023-01-01
Supplement: d2ra07898h1.pdf [file d2ra07898h1.pdf]

## Supplementary Data

### Polyoxometalate supported on magnetic Fe<sub>3</sub>O<sub>4</sub>/MIL-88A rod-like nanocomposite as an adsorbent for the removal of ciprofloxacin, tetracycline and cationic organic dyes from aqueous solutions

Mona Ashrafi and Saeed Farhadi\*

<sup>a</sup> Department of Chemistry, Lorestan University, Khorramabad, 68151-44316, Iran.

Email address: [farhadi.s@lu.ac.ir](mailto:farhadi.s@lu.ac.ir) (S. Farhadi)

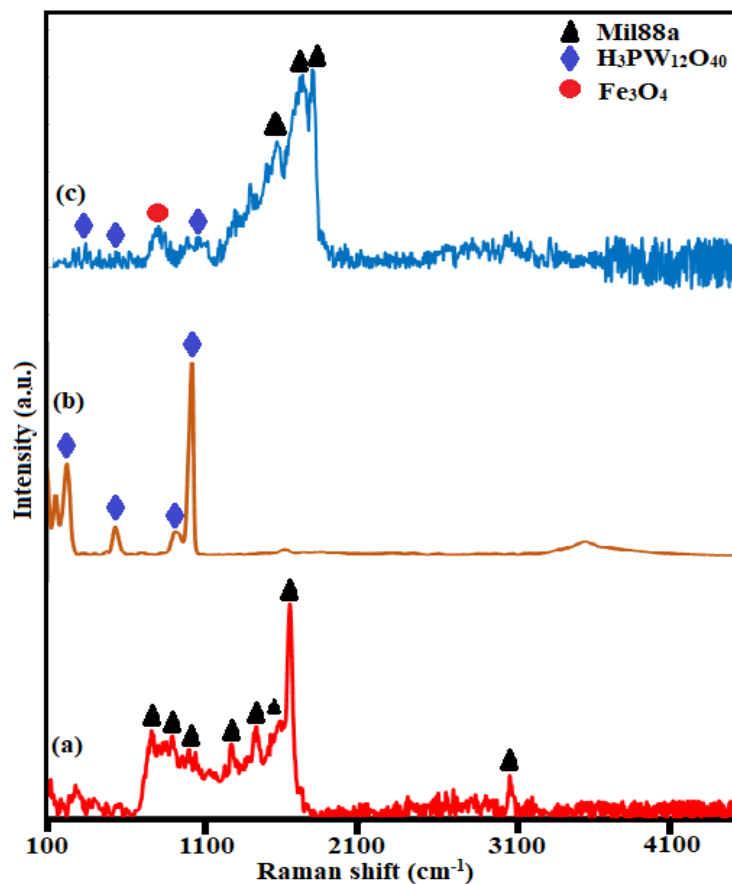

**Fig. S1.** Raman spectra of MIL-88A (a),  $\text{H}_3\text{PW}_{12}\text{O}_{40}$  (b), and  $\text{H}_3\text{PW}_{12}\text{O}_{40}/\text{Fe}_3\text{O}_4/\text{MIL-88A}$  Fe rod-like composite (c).

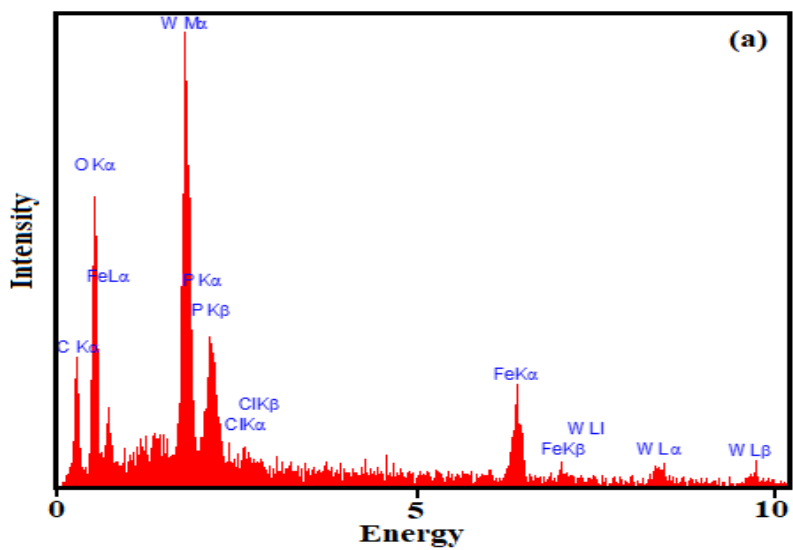

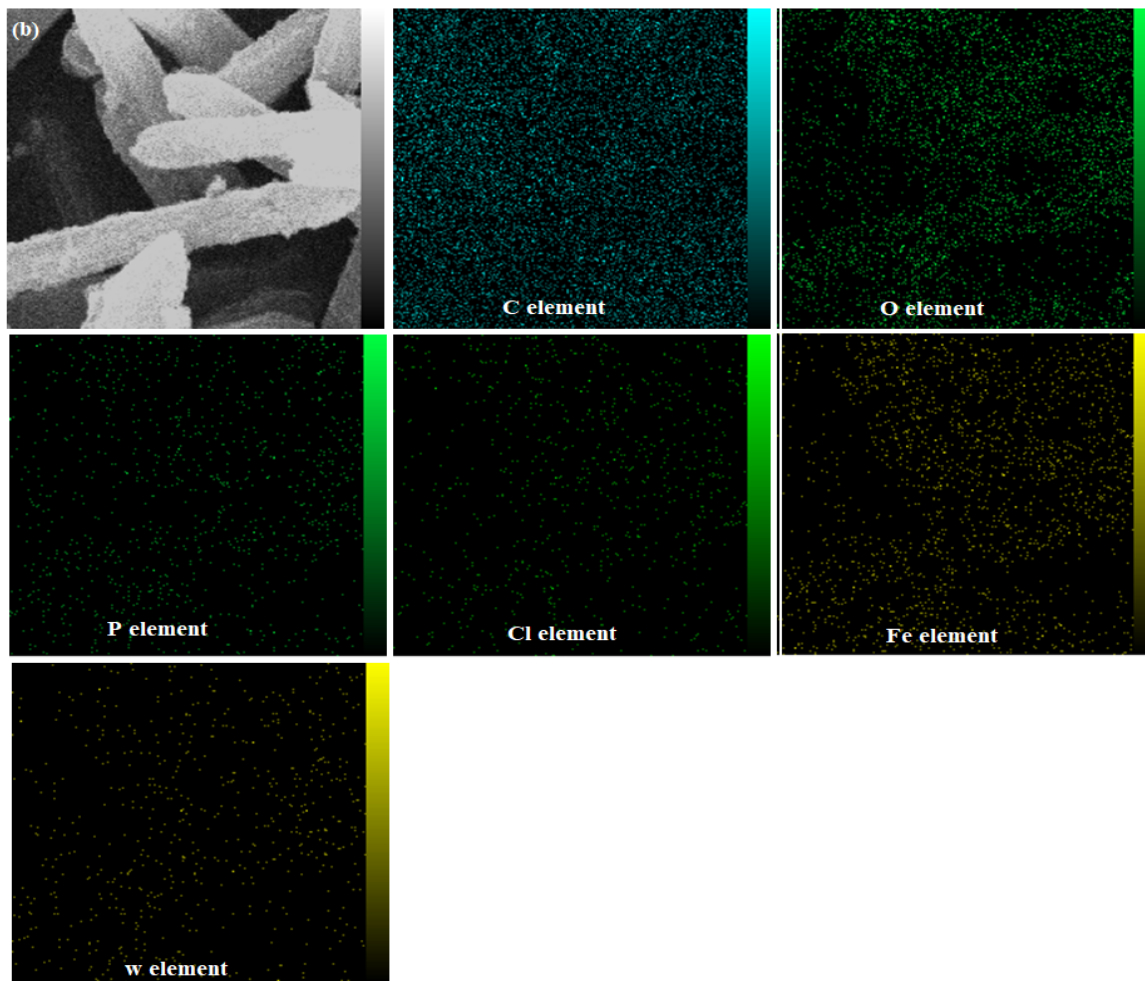

**Fig. S2.** EDX spectrum (a) and representative SEM photograph of the  $\text{H}_3\text{PW}_{12}\text{O}_{40}/\text{Fe}_3\text{O}_4/\text{MIL-88A (Fe)}$  with corresponding EDX elemental mappings (b).
